# Supplementary material for: Host-Defense Peptides as New Generation Phytosanitaries: Low Toxicity and Low Induction of Antimicrobial Resistance
Source: MDPI journal article supplement (doi:10.3390/agronomy12071614), 2022-07-05
Supplement: s1 [file s1]

| TABLE S1. HOST DEFENSE PEPTIDES AND IN PLANTA STUDIES |                                                             |                                        |                                                                                     |                                             |                                                                               |                                                                                                          |              |
|-------------------------------------------------------|-------------------------------------------------------------|----------------------------------------|-------------------------------------------------------------------------------------|---------------------------------------------|-------------------------------------------------------------------------------|----------------------------------------------------------------------------------------------------------|--------------|
| Disease                                               | Target                                                      | Peptide name                           | Sequence                                                                            | Source                                      | Plant tested on                                                               | Effectiveness                                                                                            | Concerns Ref |
| Gray mold                                             | <i>Botrytis cinerea</i>                                     | NCR044                                 | MQRVKNMTETLKFVYILILFIFLVL MVCDSAFIQLSKPCISDKECSIVKNYRARCRKGYCVRRRIR                 | <i>Medicago truncatula</i><br>(Barreclover) | Tomato germlings<br><br>Tomato, tobacco and lettuce leaves<br><br>Rose petals | Inhibition of spore germination<br><br>Reduction of disease severity<br><br>Post-harvest protection      | [59]         |
|                                                       |                                                             | <i>Aspergillus</i> AFP                 | ATYNGKCYKKDNICKYKAQSGKTAICKCYVKKCPRDGAKCEFDSYKGKCYC                                 | <i>Aspergillus Giganteus</i>                | Geranium leaves                                                               | Additive effect when combined with Cecropin A                                                            | [60]         |
|                                                       |                                                             | PeAfpA                                 | [95 amino acid sequence]                                                            | <i>Penicillium expansum</i>                 | Tomato leaves                                                                 | Prevention of infection                                                                                  | [61]         |
|                                                       |                                                             | Synthetic cationic lipopeptide         | C <sub>14</sub> -KL- <i>I</i> -K-NH <sub>2</sub><br>( <i>I</i> = <i>L</i> -leucine) | Designed de novo                            | Cucumber leaves and fruits and corn seeds                                     | Avoidance of necrotic lesions                                                                            | [64]         |
|                                                       |                                                             | Synthetic amphipathic helical peptides | Ac-WKX <sub>16</sub> *                                                              | Designed de novo                            | Arabidopsis Thaliana                                                          | Prevention of infection                                                                                  | [63]         |
| Bacterial soft rot                                    | <i>Pectobacterium carotovorum</i> subsp. <i>carotovorum</i> | Synthetic amphipathic helical peptides | Ac-WKX <sub>16</sub> *                                                              | Designed de novo                            | <i>Arabidopsis Thaliana</i>                                                   | Prevention of infection                                                                                  | [63]         |
| Fire blight                                           | <i>Erwinia Amylovora</i>                                    | ZM-804                                 | LARLRRRLCFLWAAAWPWPWR                                                               | <i>Zea mays</i> (Corn)                      | Tobacco leaves                                                                | Prevention of hypersensitive response                                                                    | [58]         |
|                                                       |                                                             | BP100                                  | KKLFFKKILKYL-NH <sub>2</sub>                                                        | Ubiquitous                                  | Fruit trees leaves                                                            | Disease severity reduced when combined with lysozyme, but degraded by plant proteases when applied alone | [66]         |

|                                                                   |                           |         |                 |       |                                |                                                                                                                                                |
|-------------------------------------------------------------------|---------------------------|---------|-----------------|-------|--------------------------------|------------------------------------------------------------------------------------------------------------------------------------------------|
| Mixtures of peptides BP100:BP100-RW, BP100:CA-M and BP100-RW:CA-M |                           |         |                 |       |                                |                                                                                                                                                |
|                                                                   |                           |         |                 |       | Fruit trees and tobacco leaves | Mixtures gave better results than peptides alone:<br>Disease severity reduction, reduction of bacterial growth and no hypersensitive response. |
|                                                                   |                           |         |                 |       |                                | [68]                                                                                                                                           |
| Tomato early blight                                               | <i>Alternaria solani</i>  | WAMP-G2 | CCGKYGFCGSGDAYC | Wheat | Tomato                         | Synergistic effect with Folicur®<br>[70]<br>[71]                                                                                               |
| Tomato wilt                                                       | <i>Fusarium oxysporum</i> | WAMP-C  | GKGSCQSQCRCR    | Wheat | Tomato                         | Synergistic effect with Folicur®<br>[70]<br>[71]                                                                                               |

| Disease                     | Target                                              | Peptide name                   | Sequence                                                               | Source                                                    | Plant tested on            | Effectiveness                                      | Concerns           | Ref  |
|-----------------------------|-----------------------------------------------------|--------------------------------|------------------------------------------------------------------------|-----------------------------------------------------------|----------------------------|----------------------------------------------------|--------------------|------|
| <i>Pseudomonas syringae</i> |                                                     | Synthetic cationic lipopeptide | C <sub>14</sub> -KL-/K-NH <sub>2</sub><br>(I = L-leucine)              | Designed de novo                                          | Tobacco leaves             | Prevention of hypersensitive response              |                    | [64] |
|                             |                                                     | ZM-804                         | LARLRRLCFLWAAAWPWPWR                                                   | Zea mays (Corn)                                           | Tobacco leaves             | Prevention of hypersensitive response              |                    | [58] |
|                             |                                                     |                                |                                                                        |                                                           | Tomato leaves              | Prevention of infection                            |                    | [58] |
| Bacterial wilt              | <i>Ralstonia solanacearum</i>                       | ZM-804                         | LARLRRLCFLWAAAWPWPWR                                                   | Zea mays (Corn)                                           | Tobacco leaves             | Prevention of hypersensitive response              |                    | [58] |
|                             |                                                     | Hcm1                           | Hybrid of Hpa1 from <i>Xanthomonas oryzae</i> , cecropin A and melitin |                                                           | Tomato plants              | Reduction of severity                              |                    | [73] |
| Rice blast                  | <i>Magnaporthe oryzae</i>                           | Hcm1                           | Hybrid of Hpa1 from <i>Xanthomonas oryzae</i> , cecropin A and melitin |                                                           | Rice leaves                | Reduction of severity                              |                    | [73] |
| Tobacco mosaic              | Tobacco mosaic virus                                | Hcm1                           | Hybrid of Hpa1 from <i>Xanthomonas oryzae</i> , cecropin A and melitin |                                                           | Tobacco leaves             | Reduction of severity                              |                    | [73] |
| Citrus canker               | <i>Xanthomonas axonopodis</i> pv <i>citri</i>       | P5VP5                          | Ac-RLIRKVKRILR-NH <sub>2</sub>                                         | Designed de novo                                          | Citrus leaves              | Reduction of severity                              |                    | [65] |
|                             | <i>Xanthomonas campestris</i> pv. <i>campestris</i> | Random peptide mixtures        | (F/K/L-K) <sub>20</sub> **                                             | Designed de novo                                          | Kohlrabi                   | Reduction of severity                              |                    | [69] |
|                             | <i>Xanthomonas perforans</i>                        | Random peptide mixtures        | (F/K/L-K) <sub>20</sub> **                                             | Designed de novo                                          | Tomato                     | Reduction of severity                              |                    | [69] |
|                             | <i>Xanthomonas citri</i>                            | Hylin-a1                       | IFGAILPLALGALKNLIK                                                     | <i>Hypsiboas albopunctatus</i>                            | Grafted citrus tree leaves | Removal of canker symptoms                         | Hemolytic activity | [57] |
|                             |                                                     | K0-W6-Hy-a1                    | KIFGAIWPLALGALKNLIK                                                    | Analogue of Hylin-a1                                      | Grafted citrus tree leaves | Removal of canker symptoms                         | Hemolytic activity | [57] |
|                             |                                                     | Tritrpticin                    | VRRFPWWWPFLRR                                                          | Porcine cathelicidin                                      | Grafted citrus tree leaves | Reduction of disease severity and bacterial growth |                    | [57] |
|                             |                                                     | Ocellatin4-analogue            | KLLKFVTKVGKAIFKALIKAI                                                  | Analogue of Ocellatin 4 ( <i>Leptodatylos ocellatus</i> ) | Grafted citrus tree leaves | Removal of canker symptoms                         | Hemolytic activity | [57] |
|                             |                                                     | Citrus-amp1                    | IETFLKQLRSAANKIVGL                                                     | <i>Citrus sinensis</i>                                    | Grafted citrus tree leaves | Reduction of disease severity and bacterial growth |                    | [57] |
|                             |                                                     | Citrus-amp2                    | LESLASSAVRTANKARAKL                                                    | <i>Citrus aurantium</i>                                   | Grafted citrus tree leaves | Ineffective                                        |                    | [57] |
|                             |                                                     |                                |                                                                        |                                                           |                            |                                                    |                    |      |
|                             |                                                     |                                |                                                                        |                                                           |                            |                                                    |                    |      |
|                             |                                                     |                                |                                                                        |                                                           |                            |                                                    |                    |      |
|                             |                                                     |                                |                                                                        |                                                           |                            |                                                    |                    |      |

| Disease    | Target                       | Peptide name                            | Sequence                            | Source               | Plant tested on  | Effectiveness           | Concerns           | Ref  |
|------------|------------------------------|-----------------------------------------|-------------------------------------|----------------------|------------------|-------------------------|--------------------|------|
| Green mold | <i>Penicillium digitatum</i> | PeAfpA                                  | [95 amino acid sequence]            | Penicillium expansum | Fruits           | Post-harvest protection |                    | [61] |
|            |                              | LfcinB20-25                             | Ac-RRWQWR-NH <sub>2</sub>           | Bovine lactoferricin | Mandarine fruits | Post-harvest protection |                    | [62] |
|            |                              | LfcinB17-31                             | Ac-FKCRRWQW RMKKLGA-NH <sub>2</sub> | Bovine lactoferricin | Mandarine fruits | Post-harvest protection |                    | [62] |
|            |                              | BP21-Cecropin A-melittin hybrid peptide |                                     |                      | Citrus fruits    | Post-harvest protection | Hemolytic activity | [72] |
| Blue mold  | <i>Penicillium italicum</i>  | BP21-Cecropin A-melittin hybrid peptide |                                     |                      | Citrus fruits    | Post-harvest protection | Hemolytic activity | [72] |
| Sour rot   | <i>Geotrichum candidum</i>   | BP21-Cecropin A-melittin hybrid peptide |                                     |                      | Citrus fruits    | Post-harvest protection | Hemolytic activity | [72] |

\*Amphipathic helical peptides, presenting different spatial distributions of the positive charges. X = K or L

\*\*Random mixture of 20-mer peptides generated by random combination of *L*-phenylalanine and *L*- or *D*-lysine
