# Supplementary material for: Host-Defense Peptides as New Generation Phytosanitaries: Low Toxicity and Low Induction of Antimicrobial Resistance
Source: MDPI journal article supplement (doi:10.3390/agronomy12071614), 2022-07-05
Supplement: s1 [file s1]

Archive with 1 entries (1 files):
- agronomy-1773886-supplementary.pdf
